# Supplementary material for: Low and heterogeneous prevalence of glucose-6-phosphate dehydrogenase deficiency in different settings in Ethiopia using phenotyping and genotyping approaches
Source: Malar J. 2018 Aug 2;17:281. doi: 10.1186/s12936-018-2437-8 (PMC6071387; doi:10.1186/s12936-018-2437-8)
Supplement: Supplementary file 2 — Additional file 2. KASP Primer sequences. [file 12936_2018_2437_MOESM2_ESM.xlsx]

## Sheet: Supplementary Table 1
Additional file 2 - KASP Primer Sequences
		Primer_X/Y - forward allele specific primers
		Primer_common - reverse primer
ID	Corresponding Allele Designation	Primer_AlleleX	Primer_AlleleY	Primer_Common	AlleleX	AlleleY	Sequence	Tm_X	CG%_X	Tm_Y	CG%_Y	Tm_Common	CG%_Common	KASP cycling conditions
G6PD_X_b36_153413623		CCAGATTGAGCTGGAGAAGCCT	CAGATTGAGCTGGAGAAGCCC	CACCCTTTCCTCACCTGCCATAAAT	A	G	AGGCATGAGGTAGCTCCACCCTCACCCCGCCCCTGCCCGCTGGGCTCTGTCCCCAGCCCCCACCCTTTCCTCACCTGCCATAAATATAGGGGATGGGCTT[A/G]GGCTTCTCCAGCTCAATCTGGTGCAGCAGTGGGGTGAAAATAYGCCAGGCCTCAMGGAGCTCGTCGCTGAGGGGACATRGTATGGCTTGGGAGGCCGGTG	64	54.5	63.3	57.1	65.8	48	61-55 touch down
G6PD_X_b36_153426256		AGTAGGTTTGACAAAGTGTGACAGC	GAGTAGGTTTGACAAAGTGTGACAGT	CTCAGTGGTTCTTTGTTCACATAGAACAA	C	T	TCTCCCTCGGCTGCCTCCTCATTCCCTTTTGGCTCTCCTTTTCTAAGTTCTGATCAGAAGTACAAAGGTGTCAAGGAGTAGGTTTGACAAAGTGTGACAG[C/T]GCGTTGTTCTATGTGAACAAAGAACCACTGAGCTCAGCCAGCACTGAGGGGCGCACRATGTGGAAGAACTAACTAGTTTTGATAGAGCTCCTGCTCAMGG	64.1	44	64.7	42.3	66.2	37.9	61-55 touch down
rs1050757		GGGTGGGAGGGAGGGACG	AGGGTGGGAGGGAGGGACA	CACGTGGGTGCTCGCCCCTT	T	C	GTGGCCATGGAGTGCAGAGTTGGTGGGACAGGGGACATCCAGGGGGCTCGAGATGTTGCTGGTGACAAGGAATGTCAAGTGGCACTGAGGCTGGCGGGCAAGGCCACAGGCAGATTCTCTCACGTGGGTGCTCGCCCCTTTCCTCCCCCT[C/T]GTCCCTCCCTCCCACCCTGGCCCCACTCAGGAGTGAGACCCAGTGGCCAATAAGCTCTGGGACAGACGAATGGGCGCCCTCCTCCTTCCTTCTGTTGGGCTGGAGTGAGTGGAGGAGGTGACTCAGCTCCTGGGCTCAGGCAGGGTCTGG	65.2	77.8	63.8	68.4	66.6	70	61-55 touch down
rs1050828		TCTGCCCGAAAACACCTTCATCA	CTGCCCGAAAACACCTTCATCG	TGTGAGGCGGGAACGGGCATA	A	G	CTGTGCCCTGCCCTCAGGTGGCTGTTCCGGGATGGCCTTCTGCCCGAAAACACCTTCATC[A/G]TGGGCTATGCCCGTTCCCGCCTCACAGTGGCTGACATCCGCAAACAGAGTGAGCCCTTCT	65.8	48	65.2	50	65.2	61.9	61-55 touch down
rs1050829		GACCCCAGGTGGAGGGCATT	ACCCCAGGTGGAGGGCATC	ACCAGCGCCTCAACAGCCACAT	A	G	TCCTATGTGGCTGGCCAGTACGATGATGCAGCCTCCTACCAGCGCCTCAACAGCCACATG[A/G]ATGCCCTCCACCTGGGGTCACAGGCCAACCGCCTCTTCTACCTGGCCTTGCCCCCGACCG	65.2	61.9	63.8	68.4	65.9	59.1	61-55 touch down
rs111827785		CGCCGGCTTCCCGAGTTCT	GCCGGCTTCCCGAGTTCC	CATAGCTGTGGGATCCGGAAGTAAA	T	C	CGTGTAGGCGGTGACGCCCTGCAAAGTGGCCGGCGTGCTTATCATTACCGAGCTTCCGCGGGCCTGCAGAGCCTGGCGGACTCAGACTTCTCTCCGGAGCGGGATGCGGCCCTACCGCGGCCTCACACTTCTCGCCGGCTTCCCGAGTTC[T/C]CGGGGGCGGGGCTTGTGTTTTTACTTCCGGATCCCACAGCTATGACACCGGAAGCCGGAAGCGTGGTAGGGAAGGGCGACCGCGAAACTGGGACTTTCTCGGAGCGCCGGGGCCCTACCAGCGTTCACAGTCCGCCGCTCCCACCCTTCT	67.2	66.7	63	72.2	65.8	48	61-55 touch down
rs113492957		AGTAGGTTTGACAAAGTGTGACAGC	GAGTAGGTTTGACAAAGTGTGACAGT	CTCAGTGGTTCTTTGTTCACATAGAACAA	C	T	GGGAGTCAGAGGACAATGGCCCCTCCTTACTCTGCCACTGGCAGAGCCCTTCTCCCTCGGCTGCCTCCTCATTCCCTTTTGGCTCTCCTTTTCTAAGTTCTGATCAGAAGTACAAAGGTGTCAAGGAGTAGGTTTGACAAAGTGTGACAG[C/T]GCGTTGTTCTATGTGAACAAAGAACCACTGAGCTCAGCCAGCACTGAGGGGCGCACGATGTGGAAGAACTAACTAGTTTTGATAGAGCTCCTGCTCAAGGTTACAAGGTAAGTTAATGGCAAAGATGGTCATACAGTAATGAGCAGAGAG	64.1	44	64.7	42.3	66.2	37.9	61-55 touch down
rs12389569		GGGTGGATCTGGGCTCACAGA	GGTGGATCTGGGCTCACAGG	TCACAGGAGCACTGAGGCCCTT	A	G	GCAAATTGTGGCTGAATTCTTTGGCATTGCAGGCAGAGAAGGGGTGAAAACAGGGCTCCAGCCTTGAACCGGTCAGCAGGGGTCAGGGAGGCTGAGTGAGTCACCCTATGGAATGGGCCAGGGTGGATCTGGGCTCACAG[A/G]CAAGGGCCTCAGTGCTCCTGTGAGCTCCAAGGGGCTGGGGAGGACTGCCTTCTTGTTCAGGGTACAGCTCGTGTTGTTTTCTCGGGCTTATGTCCATGTCTCAGTGTGGACACCCGCAACTGAGGTGACAGTGGAATGCCCTGACCTGATCTCTCATTCTCTCCCATTGTGGACCCAGTGCTGTCCTCACCTGGGACCTC	65.2	61.9	64.6	65	65.9	59.1	61-55 touch down
rs137852318		CCTTCTCATCACGGACGTCATC	CCTTCTCATCACGGACGTCATG	GAGAAGCCCGCCTCCACCAA	C	G	GCTGTGCTCAGAGGTGGTGACTTCTCCGGGGTTGAGGACACCTGCTCTGCATGCACACCCCAGCTCAGTGCCTCGTCACAGATGGGCCTGCGACAGGGCATGCTCCTGGGGACTGGGGTGCACCCCCTACCTTCTCATCACGGACGTCAT[C/G]TGAGTTGGTGGAGGCGGGCTTCTCCATGGCCACCAGACACAGCATCTGCAGTAGGTGGTTCTGCATCACGTCCCTGGGGACGGAAGAGGCCAGAGCTCGCCTTAGCTCCCCGCCCTGTTCACCTGGTTCAAGGGCATGGGGACCCCAAAC	66.9	54.2	64.6	52.2	64.6	65	61-55 touch down
rs137852328		ATAACGCAGGCGATGTTGTCCC	GATAACGCAGGCGATGTTGTCCT	GGATCTTCGGCCCCATCTGGAA	C	T	GCAGGGTGACTGGCTCTGCCACCCTGTGCCAGCCTCCCAGGAGAGAGGAAGAGCTCTCACCGGATGATCCCAAATTCATCGAAATAGCCCCCGCGACCCTCAGTGCCAAAGGGCTCCTTGAAGGTGAGGATAACGCAGGCGATGTTGTCC[C/T]GGTTCCAGATGGGGCCGAAGATCCTGTTGGCAAATCTGCAGGGAGGGGCAAGGTGGAGGAACTGACCTTGGGCCTCTGTGGTGCAGGGGCCACATGTGAGGGGTCACCCTTGTCTGAGTTCTGGAGGAATTCGTCCTCGGGGAGGCAGTG	64	54.5	64.6	52.2	65.9	59.1	61-55 touch down
rs1894260		GAGTGGGTAGGAGCTGGAAAG	GGAGTGGGTAGGAGCTGGAAAA	GGCTGGGAGGTAAAGCTCTGAGTA	C	T	TTTGGGTCTGTGCTGCTGTGGCACCTGGGACTCAGTGTGAAGGGATCAGGCTAGGTTTGAAATTCTCTTCCGGCTTAATAATTTGCAGGTCTGGGCTGGGAGGTAAAGCTCTGAGTACACTGCGAGTGTCAGGGGTCCGGCAGGGGGGCT[C/T]TTTCCAGCTCCTACCCACTCCCGCGTGGGGTGAAACCTTGAGAGATGAGACACCAATCCAGGGCCTCTGAAGACCCACGAGGTAGAGTGCACTTAACAGTAAATTGTGGGCTGGGTGCGGTGGCTCTTGCCTGTAATCCCAGCACTTTGA	63.3	57.1	64	54.5	66.9	54.2	61-55 touch down
rs2004651		CATGGGAAATAGGGAAGGTGATAACA	ATGGGAAATAGGGAAGGTGATAACC	CTGGTGAAACGCAAGCAAAGCCTTT	T	G	ATGATGCTCGATTGCGGGTTTTCTGTCTCCGCGGAGGCGCTTTTCTTTGCATTTCCGATGGGTTCATTGTAGAACTTTAAATGTCTAGTGGGTATCCAAACAGGAAGCTGACTTTTTTCCTGGTGAAACGCAAGCAAAGCCTTTCCCCCA[T/G]GTTATCACCTTCCCTATTTCCCATGTCTTATTTTTGATGTCTTTCCACCAAATCAGTTTTCCTTCATGTGGGCTGTTCTTTTTACCAGTAAAATGTTGTTCTGCAGAAGTAGTGGTCTGATTTCTATAAACGTTTAAAAATTTTAAAGTA	64.7	42.3	64.1	44	65.8	48	61-55 touch down
rs2071429		CGGCCTCCCAAGCCATACC	CCGGCCTCCCAAGCCATACT	AGCTCGTCGCTGAGGGGACAT	G	A	CCCCTGCCCGCTGGGCTCTGTCCCCAGCCCCCACCCTTTCCTCACCTGCCATAAATATAGGGGATGGGCTTGGGCTTCTCCAGCTCAATCTGGTGCAGCAGTGGGGTGAAAATACGCCAGGCCTCACGGAGCTCGTCGCTGAGGGGACAT[G/A]GTATGGCTTGGGAGGCCGGTGGCACACAGGGAGGGAGGGCAAAGGCCACCCCATAGCCCACAGGTATGCAGGGGCCGGCAGCTGGGCCTCACCTGCGCACGAAGTGCATCTGGCTCCCGCAGAAGACGTCCAGGATGAGGCGCTCATAGG	63.8	68.4	64.6	65	65.2	61.9	61-55 touch down
rs2230036		GCCGAGGTGAGGCTGCAG	GGCCGAGGTGAGGCTGCAA	TGTCGCCGGCCACATCATGGAA	C	T	CAGGTCCAGCTCCGACTCCTCGGGGTTGAAGAACATGCCCGGCTTCTTGGTCATCATCTTGGTGTACACGGCCTCGTTGGGCTGCACGCGGATCACCAGCTCGTTGCGCTTGCACTGCTGGTGGAAGATGTCGCCGGCCACATCATGGAA[C/T]TGCAGCCTCACCTCGGCCTTGCGCTCGTTCAGGGCCTTGCCGCAGCGCAGGATGAAGGGCACCCCTACGTGGCGGAAAGGGCAGCCTCAGCACCAGCTCTCTCAGGGTGTGGACCAGTGCGTGAGTGTCTCAGTGGGAGCTCCAGTGCCC	63	72.2	63.8	68.4	65.9	59.1	63 two step
rs2230037		CGTCCAGGATGAGGCGCTCA	GTCCAGGATGAGGCGCTCG	ACTCTCTCCCTCACAGAACGTGAA	A	G	ACATGGTATGGCTTGGGAGGCCGGTGGCACACAGGGAGGGAGGGCAAAGGCCACCCCATAGCCCACAGGTATGCAGGGGCCGGCAGCTGGGCCTCACCTGCGCACGAAGTGCATCTGGCTCCCGCAGAAGACGTCCAGGATGAGGCGCTC[A/G]TAGGCGTCAGGGAGCTTCACGTTCTGTGAGGGAGAGAGTGTCTTGCTGATGCCACTGCCTGCCACCATGTGGAGTCCCCCGGGCCCAGGCCGCCCACCCTCCACACTGCTCCTTCTCTGTAGGGCACCTTGTATCTGTTGCCGTAGGTCA	64.6	65	63.8	68.4	65.2	50	61-55 touch down
rs2515904		GGCGTCTGAATGATGCAGCTC	GGCGTCTGAATGATGCAGCTG	CCCTCTTCGGGGAGTGAGGAT	G	C	ACGGAACAGGGAGGAGATGTGGTTGGACAGCCGGTCAGAGCTCTGCAGGTCCCTCCCGAAGGGCTTCTCCACGATGATGCGGTTCCAGCCTCTGCTGGGAGCCCGGAGCTGCGTTACCCCCTTGAACCCCTCTTCGGGGAGTGAGGATCA[G/C]AGCTGCATCATTCAGACGCCCTCCCAGGGGAGTAGAGGCCAGAACCTCCTCGCCCCCGTGGCCACCTCCCGTGCCTTGTGTTCCCAGATGACCCTCTGGCTCAACACCTTCCGGGAAGCCTTCCCACCCTGGGTGCCAGGGTGGCATTGC	63.3	57.1	63.3	57.1	65.2	61.9	61-55 touch down
rs2515905		CCCCTACACAGCCAAGCACC	ACCCCTACACAGCCAAGCACT	TAAATCAAGGAAGGACATGGTGATGCTAT	G	A	CCTGTTCACCTGGTTCAAGGGCATGGGGACCCCAAACAAGGCTTCCTAGTGACAAGCTGCAAGACTCACTTCCTGATCCCCCTTGTCTTCCAGGTCCCCTTAAATCAAGGAAGGACATGGTGATGCTATCACTGAATCATAAAACCGTGG[G/A]GTGCTTGGCTGTGTAGGGGTCCAGCCCTTTCCAGCCCGGTCTGATAGCTCAGACACTTAGGTTTTGAACTGCAGGGTGAGGAGGAGCTCCCCCAAGATAGGGAAGAGTAGCCCTGCAGGGTGACTGGCTCTGCCACCCTGTGCCAGCCTC	64.6	65	63.3	57.1	66.2	37.9	61-55 touch down
rs2515906		GATCTGCCCATCTTGGCTTCCTA	ATCTGCCCATCTTGGCTTCCTG	GCTCAAGCGTGTAATCTCAGCACTT	A	G	CCTCAGCCTCCTGAGTAGCTGGGACCACAGGTGCCCGCCACCACGCCTGGCAAATTTTTGTATTTTTTTTGGTAGGGACATGTTTTCGTCATGTTGGTCAGGCTGGTCTTGAACTTCTGGCCTCAAGTGATCTGCCCATCTTGGCTTCCT[A/G]AAGTGCTGAGATTACACGCTTGAGCCACTGCGCCTGGCCTTACTTGGGTGTTGTTCCCTGCCCTGGAACCTACCCTGCTTAGCCTTACCACACCCCATCAGCCCCCAGCCCAACCCGACTCTCAGCCTTGCCACAGCCCCTTCTGGAGGC	65.2	50	64	54.5	65.8	48	57 two step
rs28470352		CTTTGCTTTTGTTTGCACTTCACCAA	CTTTGCTTTTGTTTGCACTTCACCAT	GCAAAAGAGCGAGACTCCGACTTAA	A	T	GTGGCTGGGTTCCCATAAAACTGTATTTACAAACACCCAATGTCTACTTAGGTGAGCTGCACATTGACCTCTTTAGCTCGTTATTCCTTCTTGCATCTCAGATTGTTCCATCTAGTACTGGGTTTCTTCTGCTTGAGGCACACACTTTTTGGTGAGAAAATGTTGGTGGCAAATTCTTTGCTTTTGTTTGCACTTCACCA[A/T]CATACTTGAAAGATTTTTTTTTTTTTAAGTCGGAGTCTCGCTCTTTTGCCCAGGCTGGAGTGCAGTGGCACAATCTAGGCTCACTACAACCTCTGCCTCCCGGGTTCAAGTGATTCTGCTTCAGCCTCCCACGCAGCTGGGATTACAGGCAAGCGCCACCATGCCTGGCTAATATTTGTATTTTTATTACAGAC…	63.7	37	64.8	34.5	65.8	48	61-55 touch down
rs35228794		GAAGATTTTTGCTTTTGTGTAATGATTATCAG	GAAGATTTTTGCTTTTGTGTAATGATTATCAA	GCATGGCAGATTGGTCTTGCTGATT	C	T	GAATTCGTAATCAGGCAAGATTACGAATAGTAAAATTGTGTGGAAGTGACCCAGATAAAATCATTGTTCCTTTAAATAAGGAACAGGTTAGACAAGCCTTTATCAATTCTGGTGCATGGCAGATTGGTCTTGCTGATTTTGTGGAAATTA[C/T]TGATAATCATTACACAAAAGCAAAAATCTTCCAGTTTTTAAAATTGACTACTTGGATTTTACCTAAAATTACCAGACATAAACCTTTAGAAAATCTTCTGACAGTGTTTACTGATGGTTCCAGCAATGGAAAAGAGGCTTACACTGGACC	64.8	28.1	63.5	25	65.8	48	63 two step
rs4898389		GCCCCAGACCCTATCAGAATCA	CCCCAGACCCTATCAGAATCG	ACTTTCTACACCTCCCTCAACTTAGATA	A	G	ATTATGTTCCCAGAACTCAGTCCCACGTTGCCCCAGACCCTATCAGAATC[A/G]GTGATCTCTAATTGGTATCTAAGTTGAGGGAGGTGTAGAAAGTCTGGGTA	64.6	52.2	63.3	57.1	65.7	39.3	61-55 touch down
rs5030868		ACCGGCTGTCCAACCACATCTT	CCGGCTGTCCAACCACATCTC	CGGTAGATCTGGTCCTCACGGAA	A	G	ATGTGAGGGGTCACCCTTGTCTGAGTTCTGGAGGAATTCGTCCTCGGGGAGGCAGTGGGCCAGGTGAGGCTCCTGAGTACCACCCCCACCCTGGTCCCCCGGCCCAGGCTTGGCCCCACCTCAGCACCATGAGGTTCTGCACCATCTCCTTGCCCAGGTAGTGGTCGATGCGGTAGATCTGGTCCTCACGGAACAGGGAG[A/G]AGATGTGGTTGGACAGCCGGTCAGAGCTCTGCAGGTCCCTCCCGAAGGGCTTCTCCACGATGATGCGGTTCCAGCCTCTGCTGGGAGCCCGGAGCTGCGTTACCCCCTTGAACCCCTCTTCGGGGAGTGAGGATCAGAGCTGCATCATTCAGACGCCCTCCCAGGGGAGTAGAGGCCAGAACCTCCTCGCCCCC…	64	54.5	65.2	61.9	66.4	56.5	61-55 touch down
rs5030869		CCGCGGGTCCACCACCG	CCCGCGGGTCCACCACCA	CACATAGAGGACGACGGCTGCAA	C	T	AGTGCCCGCACACAGGGCATGCCCAGTTCTGCCTTGCTGGGCCTCGAAGGCATCACCTACCATCCCACCTCTCATTCTCCACATAGAGGACGACGGCTGCAAAAGTGG[T/C]GGTGGTGGACCCGCGGGGCACCGTGGGGTCGTCCAGGTACCCTTTGGTGGCCTCGCCCTCTCCATC	64.4	82.4	65.2	77.8	66.4	56.5	61-55 touch down
rs5030872		AGATGTGGTTGGACAGCCGGT	AGATGTGGTTGGACAGCCGGA	CGCATCATCGTGGAGAAGCCCTT	T	A	CCTGAGTACCACCCCCACCCTGGTCCCCCGGCCCAGGCTTGGCCCCACCTCAGCACCATGAGGTTCTGCACCATCTCCTTGCCCAGGTAGTGGTCGATGCGGTAGATCTGGTCCTCACGGAACAGGGAGGAGATGTGGTTGGACAGCCGG[T/A]CAGAGCTCTGCAGGTCCCTCCCGAAGGGCTTCTCCACGATGATGCGGTTCCAGCCTCTGCTGGGAGCCCGGAGCTGCGTTACCCCCTTGAACCCCTCTTCGGGGAGTGAGGATCAGAGCTGCATCATTCAGACGCCCTCCCAGGGGAGTA	63.3	57.1	63.3	57.1	66.4	56.5	61-55 touch down
rs5986877		TTAGCAACTGTGGCTGACGTC	CTTTAGCAACTGTGGCTGACGTG	CTCCACCTTGCTCTTCCCCCTT	C	G	TGCCTCCATTATAAGCAGAAGAGCTCTGCTTTAGCAACTGTGGCTGACGT[C/G]AGATGGGTGCCTGAGAGGAGGAAGGGGGAAGAGCAAGGTGGAGGGGCTGG	67.4	52	64.6	52.2	65.9	59.1	61-55 touch down
rs5986990		GGTGACCTGGACTGGCAGTC	AGGTGACCTGGACTGGCAGTT	CTGTCAGGCCTGGGACATGACAA	G	A	CAGCTCAGGGCCCCTCCCTGAGGACCCTCCAGGACCACCCTGGTCCATCTCGAGTCTATTCTGATGAACAAGCTGAGGCCCAGAGAGGCAATGGCCTTCCCTGGTCACATAGTGACTGTCAGGCCTGGGACATGACAACTTGGGCTTCAT[G/A]ACTGCCAGTCCAGGTCACCTCCGGGAGGCCACGCTGTGCTCAGAGGTGGTGACTTCTCCGGGGTTGAGGACACCTGCTCTGCATGCACACCCCAGCTCAGTGCCTCGTCACAGATGGGCCTGCGACAGGGCATGCTCCTGGGGACTGGGG	64.6	65	63.3	57.1	66.4	56.5	61-55 touch down
rs60030796		GTGCTAGGAAAATATAATGAATTCGAGAAAT	GCTAGGAAAATATAATGAATTCGAGAAAC	GGTGCACTTCCTGGTGCAATGTAAT	A	G	GTGATCAGGCTGACGCCACCTGAACCTAAATAGCATCACAATAAAGACAAAGAAAGATGTGGTGCACTTCCTGGTGCAATGTAATGGGAAAGCACAGTCCCACCTGGAGAGTGGTCTTGGCCAAAAAGAAAAATGTTTTCT[A/G]TTTCTCGAATTCATTATATTTTCCTAGCACAATGTCCAGTTAATCGTTTTTTAAATTTACTACAGTGAATTTATCTTATTGTTTTTCAAATCTCTGCTATACCTATAGTTATATATAATCTTTCCAGACTT	64.8	28.1	63.9	30	65.8	48	61-55 touch down
rs61042368		TCCCTCAAAGCTTCCTCGAAGTA	CCCTCAAAGCTTCCTCGAAGTG	GCTTCACTGCTCGCCTCCACTA	A	G	GGAACTCTTGGGCTCAAGCAAAATGCCCAAAGTGCTGGGATTACAGGAGTGAGACACTGTGTCCAGCCATAGAGTCTCACTGTCCTTACAGAAAGCCAGAATTCAGTCTGCTTCTTGTTCCCTCAAAGCTTCCTCGAAGT[A/G]TTCTAGTGGAGGCGAGCAGTGAAGCTCTAGGAGGCAAGAGGCCTTCTCAGGGACCCCAGCTTTGGCCTGTATGTCTGGGTGTCGTCCTGGACTAGTCTGATCACGTCTCACAGCTGAGTTTCTCAGCTTCTCCTCCTGCA	63.5	45.8	65.2	50	65.9	59.1	61-55 touch down
rs7053878		GGACATCTTCATCCCCTTATTTAAAAAAAA	GGACATCTTCATCCCCTTATTTAAAAAAAT	CCAGCCTGAGCAACAGAGGAGAT	T	A	GCCACTGCACTCCAGCCTGAGCAACAGAGGAGATGCTGTCTCAAAAAAAA[T/A]TTTTTTTAAATAAGGGGATGAAGATGTCCCTCTTATGGAGCAGACCGTGT	63.9	30	63.9	30	66.4	56.5	61-55 touch down
rs73573478		AACAAGCTGAGGCCCAGAGAG	GAACAAGCTGAGGCCCAGAGAA	GCAGTCATGAAGCCCAAGTTGTCAT	G	A	CAGATGTGCAGCCCTCAGGGCAGGAGGAGGCCCCTGCTTGGCTCTGCTCACCCTGCCAGAGGCCCAGCTCAGGGCCCCTCCCTGAGGACCCTCCAGGACCACCCTGGTCCATCTCGAGTCTATTCTGATGAACAAGCTGAGGCCCAGAGA[G/A]GCAATGGCCTTCCCTGGTCACATAGTGACTGTCAGGCCTGGGACATGACAACTTGGGCTTCATGACTGCCAGTCCAGGTCACCTCCGGGAGGCCACGCTGTGCTCAGAGGTGGTGACTTCTCCGGGGTTGAGGACACCTGCTCTGCATGC	63.3	57.1	64	54.5	65.8	48	61-55 touch down
rs762515		CAAGCATGTCTGTCTTGCCTGATAT	AAGCATGTCTGTCTTGCCTGATAC	CAGGCTTGAATCTCGGGGCTCTT	T	C	TCTTGGCCAGGTCACCCTGTGGCAGAGGGAACAGGTGTGTGGTTAGAAGTGGCTGGGGACACGACCTACATACATCATCCTCCACCCTTGGTGATCTGGGCACTACTCAGGATCACTACTGGGCCACAAGCATGTCTGTCTTGCCTGATA[T/C]ACAGACAGAAGAGCCCCGAGATTCAAGCCTGTGCCAGCCCTCCATCCCTGACCCAGAAGACATAAACGCATCTCCTGCGTTCCAGGAGAAAACCTGAAAATTCAATTCAGTAGAACCAAGGGACGACAGAAGTACCATGTAGCCACATTT	64.1	44	63.5	45.8	66.4	56.5	61-55 touch down
rs762516		GTCTCACAAATGTGGCTACATGG	ACGTCTCACAAATGTGGCTACATGA	GTAGAACCAAGGGACGACAGAAGTA	C	T	CTGTCTTGCCTGATATACAGACAGAAGAGCCCCGAGATTCAAGCCTGTGCCAGCCCTCCATCCCTGACCCAGAAGACATAAACGCATCTCCTGCGTTCCAGGAGAAAACCTGAAAATTCAATTCAGTAGAACCAAGGGACGACAGAAGTA[C/T]CATGTAGCCACATTTGTGAGACGTGACCTCAAGTGCTTACATTAGCAAAAAAGAGTGGTTCAAAAATAAGGAGCTAAGCATTCCACTTAAGAAGTGAGAAAAAGGGCCAGATGCGGTGGCTCACACCTGTAATCCCAGCACTTTGGGAGG	62.9	47.8	64.1	44	65.8	48	61-55 touch down
rs766420		ATAATCTGTTAGGTTCAGATTTTACAGATC	ATAATCTGTTAGGTTCAGATTTTACAGATG	TGAGAATACCAGAGATCATGTTCCCTTT	C	G	AATAGAAATCACTTGAAATGAATAATCTGTTAGGTTCAGATTTTACAGAT[C/G]TAAGGCCAGGAATAAAAGGGAACATGATCTCTGGTATTCTCACAAAAGCC	63.9	30	63.9	30	65.7	39.3	61-55 touch down
rs76723693		CGAGGCCACCAAAGGGTACCT	GAGGCCACCAAAGGGTACCC	CACATAGAGGACGACGGCTGCAA	A	G	TCATTCTCCACATAGAGGACGACGGCTGCAAAAGTGGCGGTGGTGGACCCGCGGGGCACCGTGGGGTCGTCC[G/A]GGTACCCTTTGGTGGCCTCGCCCTCTCCATCGGGGTTCCCCACGTACTGGCCCAGGACCACA	65.2	61.9	64.6	65	66.4	56.5	61-55 touch down
rs7879049		GAGCACATCCTGGCATAGAGCAT	AGCACATCCTGGCATAGAGCAC	GGGAGTGAGAAAAGCCGGGCAT	A	G	AGGCCTCCTCTCCAGGGGTGCTCAGGGGAGTGAGAAAAGCCGGGCATGCC[A/G]TGCTCTATGCCAGGATGTGCTCTGTGCCATGGGCTGTGGTAAAAAAGAAA	64.6	52.2	64	54.5	65.9	59.1	61-55 touch down
rs915941		GCGTAAGAACCATAGAGTCCTGT	GCGTAAGAACCATAGAGTCCTGG	TGACAGAGCGTCCACCCGTCTT	A	C	GAGCGGCTGCGTCTATGGTCATGACGTCTGACAGAGCGTCCACCCGTCTTCG[A/C]CAGGACTCTATGGTTCTTACGCGCGCAGACAGACCGCCTATATAAGCCAT	62.9	47.8	64.6	52.2	65.9	59.1	61-55 touch down
rs915942		CCTCTTTCCCTTCGGTGTGGTA	CTCTTTCCCTTCGGTGTGGTG	CGCAAGAGACGACAACTGCGCTT	A	G	ATATAAGCCATGCGCAGGCGGAGGAGCGCCTCTTTCCCTTCGGTGTGGT[A/G]AGTAAGCGCAGTTGTCGTCTCTTGCGGTGCCGTTGCTGGTTCTCACACCT	64	54.5	63.3	57.1	66.4	56.5	61-55 touch down
