# Supplementary material for: Low and heterogeneous prevalence of glucose-6-phosphate dehydrogenase deficiency in different settings in Ethiopia using phenotyping and genotyping approaches
Source: Malar J. 2018 Aug 2;17:281. doi: 10.1186/s12936-018-2437-8 (PMC6071387; doi:10.1186/s12936-018-2437-8)
Supplement: Supplementary file 3 — Additional file 3. Genotyping overview. [file 12936_2018_2437_MOESM3_ESM.xlsx]

## Sheet: Genotyping all
Additional file 3 - Genotyping Overview
SNP	Plate	Y	Heterozygous	X	Unused	Bad	Allele Y%	Allele X%	Allele Y	Allele X
rs5030868	ETHIOPIA_Plate 1	91	0	0	4	1	100	0	G	A
rs5030868	ETHIOPIA_Plate 2	61	0	0	0	3	100	0	G	A
rs5030868	ETHIOPIA_Plate 3	72	0	0	1	20	100	0	G	A
rs1050828	ETHIOPIA_Plate 1	85	0	0	10	1	100	0	G	A
rs1050828	ETHIOPIA_Plate 2	53	1	4	3	3	92.24	7.76	G	A
rs1050828	ETHIOPIA_Plate 3	68	0	0	5	20	100	0	G	A
rs1050829	ETHIOPIA_Plate 1	3	13	74	5	1	10.56	89.44	G	A
rs1050829	ETHIOPIA_Plate 2	7	4	49	1	3	15	85	G	A
rs1050829	ETHIOPIA_Plate 3	4	4	64	1	20	8.33	91.67	G	A
rs5030869	ETHIOPIA_Plate 1	0	0	87	8	1	0	100	T	C
rs5030869	ETHIOPIA_Plate 2	0	0	61	0	3	0	100	T	C
rs5030869	ETHIOPIA_Plate 3	0	0	71	2	20	0	100	T	C
rs76723693	ETHIOPIA_Plate 1	0	0	85	10	1	0	100	G	A
rs76723693	ETHIOPIA_Plate 2	0	0	58	3	3	0	100	G	A
rs76723693	ETHIOPIA_Plate 3	0	0	65	8	20	0	100	G	A
rs137852318	ETHIOPIA_Plate 1	0	0	90	5	1	0	100	G	C
rs137852318	ETHIOPIA_Plate 2	0	0	60	1	3	0	100	G	C
rs137852318	ETHIOPIA_Plate 3	0	0	72	1	20	0	100	G	C
rs35228794	ETHIOPIA_Plate 1	20	19	47	9	1	34.3	65.7	T	C
rs35228794	ETHIOPIA_Plate 2	15	7	32	7	3	34.26	65.74	T	C
rs35228794	ETHIOPIA_Plate 3	16	10	43	4	20	30.43	69.57	T	C
rs2230036	ETHIOPIA_Plate 1	4	1	79	11	1	5.36	94.64	T	C
rs2230036	ETHIOPIA_Plate 2	0	3	55	3	3	2.59	97.41	T	C
rs2230036	ETHIOPIA_Plate 3	1	0	68	4	20	1.45	98.55	T	C
rs1894260	ETHIOPIA_Plate 1	6	14	68	7	1	14.77	85.23	T	C
rs1894260	ETHIOPIA_Plate 2	4	7	47	3	3	12.93	87.07	T	C
rs1894260	ETHIOPIA_Plate 3	10	4	56	3	20	17.14	82.86	T	C
rs73573478	ETHIOPIA_Plate 1	7	4	75	9	1	10.47	89.53	A	G
rs73573478	ETHIOPIA_Plate 2	2	3	55	1	3	5.83	94.17	A	G
rs73573478	ETHIOPIA_Plate 3	1	0	67	5	20	1.47	98.53	A	G
rs2515906	ETHIOPIA_Plate 1	11	8	66	10	1	17.65	82.35	G	A
rs2515906	ETHIOPIA_Plate 2	4	12	45	0	3	16.39	83.61	G	A
rs2515906	ETHIOPIA_Plate 3	15	6	47	5	20	26.47	73.53	G	A
rs762515	ETHIOPIA_Plate 1	2	13	73	7	1	9.66	90.34	C	T
rs762515	ETHIOPIA_Plate 2	7	4	49	1	3	15	85	C	T
rs762515	ETHIOPIA_Plate 3	4	3	63	2	20	7.86	92.14	C	T
rs111827785	ETHIOPIA_Plate 1	9	16	63	7	1	19.32	80.68	C	T
rs111827785	ETHIOPIA_Plate 2	12	4	45	0	3	22.95	77.05	C	T
rs111827785	ETHIOPIA_Plate 3	6	4	59	4	20	11.59	88.41	C	T
rs1050757	ETHIOPIA_Plate 1	17	16	49	13	1	30.49	69.51	C	T
rs1050757	ETHIOPIA_Plate 2	10	13	34	4	3	28.95	71.05	C	T
rs1050757	ETHIOPIA_Plate 3	19	11	36	7	20	37.12	62.88	C	T
rs2515904	ETHIOPIA_Plate 1	1	1	89	4	1	1.65	98.35	C	G
rs2515904	ETHIOPIA_Plate 2	4	1	56	0	3	7.38	92.62	C	G
rs2515904	ETHIOPIA_Plate 3	0	2	70	1	20	1.39	98.61	C	G
rs5030872	ETHIOPIA_Plate 1	0	0	92	3	1	0	100	A	T
rs5030872	ETHIOPIA_Plate 2	0	0	61	0	3	0	100	A	T
rs5030872	ETHIOPIA_Plate 3	0	0	73	0	20	0	100	A	T
rs137852328	ETHIOPIA_Plate 1	0	0	90	5	1	0	100	T	C
rs137852328	ETHIOPIA_Plate 2	0	0	61	0	3	0	100	T	C
rs137852328	ETHIOPIA_Plate 3	0	0	73	0	20	0	100	T	C
rs5986990	ETHIOPIA_Plate 1	2	12	69	12	1	9.64	90.36	A	G
rs5986990	ETHIOPIA_Plate 2	6	4	44	7	3	14.81	85.19	A	G
rs5986990	ETHIOPIA_Plate 3	4	4	57	8	20	9.23	90.77	A	G
rs2515905	ETHIOPIA_Plate 1	1	1	87	6	1	1.69	98.31	A	G
rs2515905	ETHIOPIA_Plate 2	4	1	55	1	3	7.5	92.5	A	G
rs2515905	ETHIOPIA_Plate 3	0	2	68	3	20	1.43	98.57	A	G
rs762516	ETHIOPIA_Plate 1	1	1	88	5	1	1.67	98.33	T	C
rs762516	ETHIOPIA_Plate 2	4	1	56	0	3	7.38	92.62	T	C
rs762516	ETHIOPIA_Plate 3	0	2	71	0	20	1.37	98.63	T	C
rs2071429	ETHIOPIA_Plate 1	17	17	51	10	1	30	70	A	G
rs2071429	ETHIOPIA_Plate 2	10	11	37	3	3	26.72	73.28	A	G
rs2071429	ETHIOPIA_Plate 3	20	10	37	6	20	37.31	62.69	A	G
rs113492957	ETHIOPIA_Plate 1	7	3	82	3	1	9.24	90.76	T	C
rs113492957	ETHIOPIA_Plate 2	2	3	56	0	3	5.74	94.26	T	C
rs113492957	ETHIOPIA_Plate 3	1	0	70	2	20	1.41	98.59	T	C
rs2004651	ETHIOPIA_Plate 1	13	11	68	3	1	20.11	79.89	G	T
rs2004651	ETHIOPIA_Plate 2	5	11	44	1	3	17.5	82.5	G	T
rs2004651	ETHIOPIA_Plate 3	15	7	49	2	20	26.06	73.94	G	T
rs2230037	ETHIOPIA_Plate 1	44	17	23	11	1	62.5	37.5	G	A
rs2230037	ETHIOPIA_Plate 2	28	14	16	3	3	60.34	39.66	G	A
rs2230037	ETHIOPIA_Plate 3	37	8	25	3	20	58.57	41.43	G	A
G6PD_X_b36_153413623	ETHIOPIA_Plate 1	83	3	1	8	1	97.13	2.87	G	A
G6PD_X_b36_153413623	ETHIOPIA_Plate 2	59	0	2	0	3	96.72	3.28	G	A
G6PD_X_b36_153413623	ETHIOPIA_Plate 3	67	0	2	4	20	97.1	2.9	G	A
G6PD_X_b36_153426256	ETHIOPIA_Plate 1	7	3	80	5	1	9.44	90.56	T	C
G6PD_X_b36_153426256	ETHIOPIA_Plate 2	1	3	56	1	3	4.17	95.83	T	C
G6PD_X_b36_153426256	ETHIOPIA_Plate 3	1	0	72	0	20	1.37	98.63	T	C
rs12389569	ETHIOPIA_Plate 1	82	2	0	11	1	98.81	1.19	G	A
rs12389569	ETHIOPIA_Plate 2	59	0	0	2	3	100	0	G	A
rs12389569	ETHIOPIA_Plate 3	69	0	0	4	20	100	0	G	A
rs28470352	ETHIOPIA_Plate 1	69	14	2	10	1	89.41	10.59	T	A
rs28470352	ETHIOPIA_Plate 2	49	4	7	1	3	85	15	T	A
rs28470352	ETHIOPIA_Plate 3	63	4	4	2	20	91.55	8.45	T	A
rs60030796	ETHIOPIA_Plate 1	2	10	76	7	1	7.95	92.05	G	A
rs60030796	ETHIOPIA_Plate 2	2	3	55	1	3	5.83	94.17	G	A
rs60030796	ETHIOPIA_Plate 3	4	1	67	1	20	6.25	93.75	G	A
rs61042368	ETHIOPIA_Plate 1	88	0	4	3	1	95.65	4.35	G	A
rs61042368	ETHIOPIA_Plate 2	57	3	0	1	3	97.5	2.5	G	A
rs61042368	ETHIOPIA_Plate 3	72	0	1	0	20	98.63	1.37	G	A
rs766420	ETHIOPIA_Plate 1	38	16	35	3	1	51.69	48.31	G	C
rs766420	ETHIOPIA_Plate 2	22	17	21	1	3	50.83	49.17	G	C
rs766420	ETHIOPIA_Plate 3	18	9	41	3	20	33.09	66.91	G	C
rs915941	ETHIOPIA_Plate 1	19	16	54	6	1	30.34	69.66	C	A
rs915941	ETHIOPIA_Plate 2	11	12	38	0	3	27.87	72.13	C	A
rs915941	ETHIOPIA_Plate 3	17	2	53	1	20	25	75	C	A
rs915942	ETHIOPIA_Plate 1	58	15	19	3	1	71.2	28.8	G	A
rs915942	ETHIOPIA_Plate 2	40	10	8	3	3	77.59	22.41	G	A
rs915942	ETHIOPIA_Plate 3	54	2	15	2	20	77.46	22.54	G	A
rs4898389	ETHIOPIA_Plate 1	54	16	18	6	1	70.45	29.55	G	A
rs4898389	ETHIOPIA_Plate 2	40	11	9	1	3	75.83	24.17	G	A
rs4898389	ETHIOPIA_Plate 3	39	12	20	2	20	63.38	36.62	G	A
rs5986877	ETHIOPIA_Plate 1	55	17	19	4	1	69.78	30.22	G	C
rs5986877	ETHIOPIA_Plate 2	38	12	8	3	3	75.86	24.14	G	C
rs5986877	ETHIOPIA_Plate 3	36	11	21	5	20	61.03	38.97	G	C
rs7879049	ETHIOPIA_Plate 1	35	15	32	12	1	51.83	48.17	G	A
rs7879049	ETHIOPIA_Plate 2	21	17	22	1	3	49.17	50.83	G	A
rs7879049	ETHIOPIA_Plate 3	28	7	34	4	20	45.65	54.35	G	A
rs7053878	ETHIOPIA_Plate 1	11	16	61	7	1	21.59	78.41	A	T
rs7053878	ETHIOPIA_Plate 2	5	7	47	2	3	14.41	85.59	A	T
rs7053878	ETHIOPIA_Plate 3	11	5	57	0	20	18.49	81.51	A	T
